# Supplementary material for: Sevanol and Its Analogues: Chemical Synthesis, Biological Effects and Molecular Docking
Source: PubMed Central journal article supplement (PMC7466040; doi:10.3390/ph13080163), 2020-07-24

$^1\text{H}$  NMR data for **1** in  $\text{CDCl}_3$ , 300MHz:

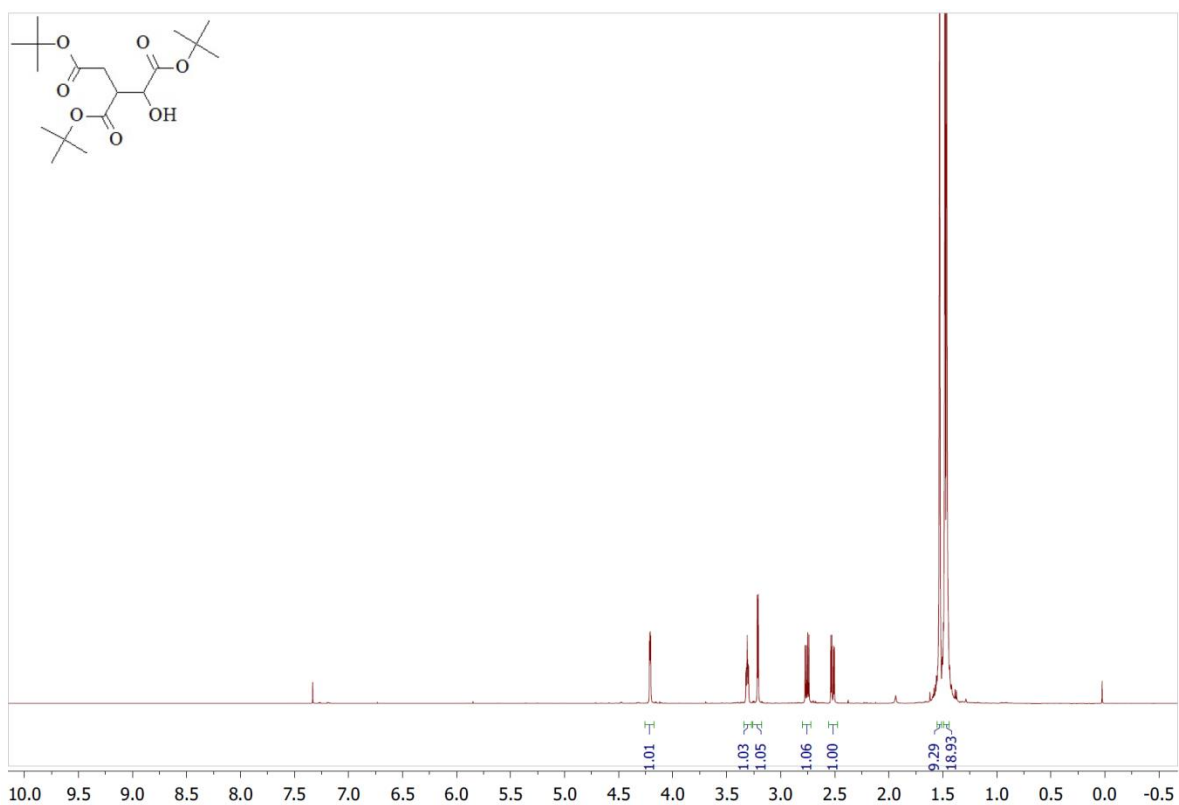

$^1\text{H}$  and  $^{13}\text{C}$  NMR data for **3b** in  $\text{CDCl}_3$ , 600MHz:

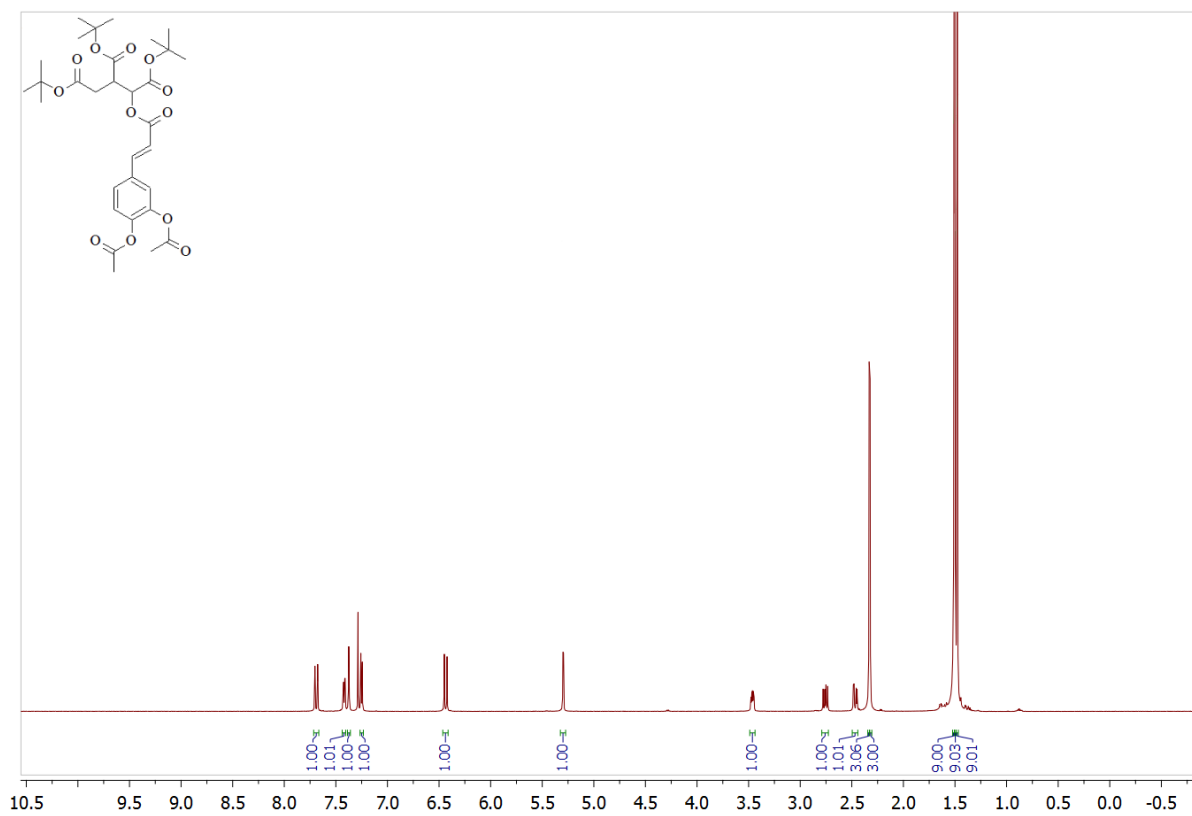



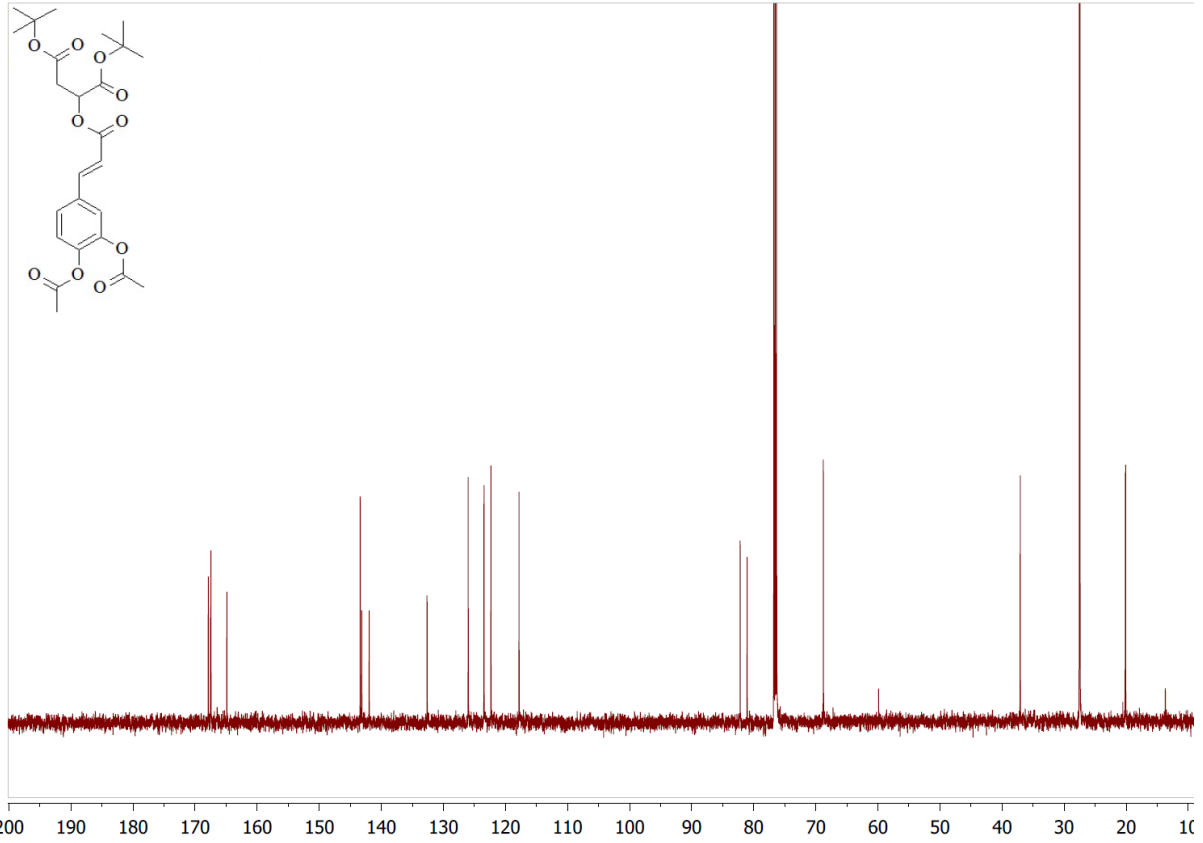

<sup>1</sup>H NMR data for **4** in CDCl<sub>3</sub>, 600MHz:

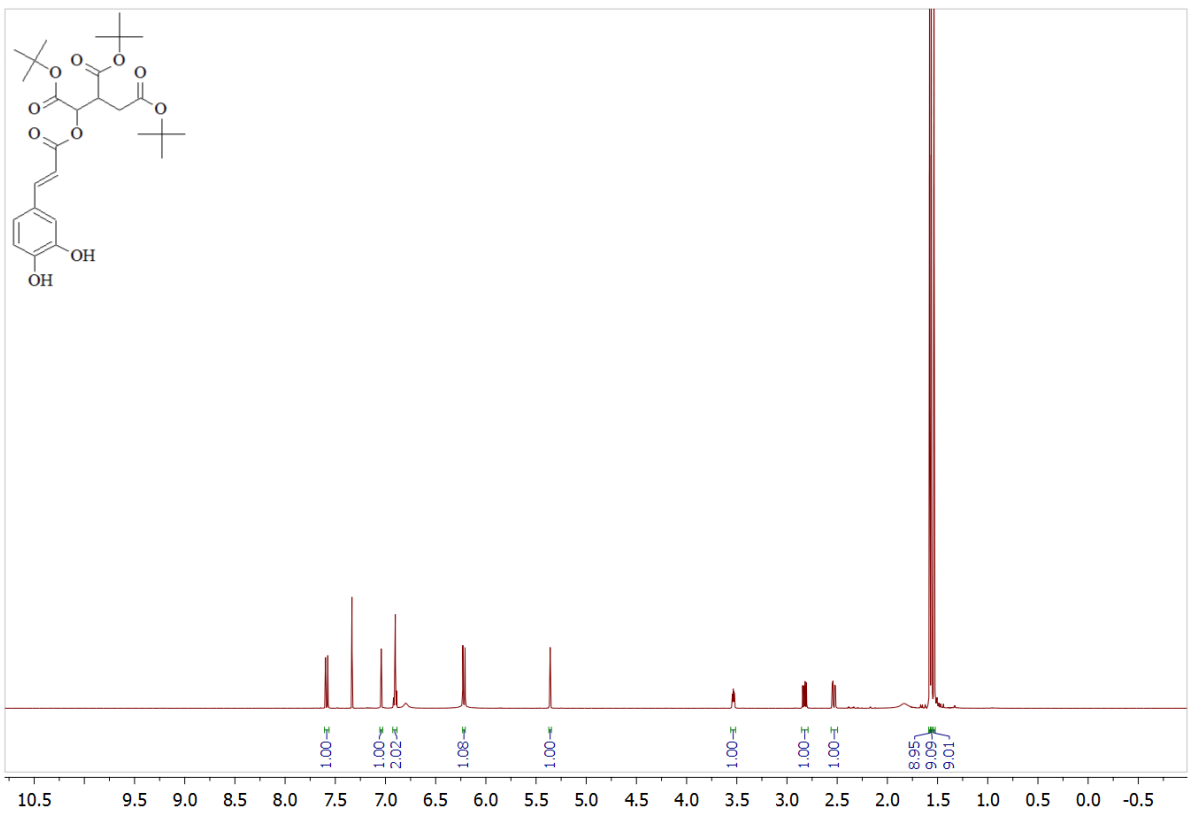

$^1\text{H}$  and  $^{13}\text{C}$  NMR data for **9** in  $\text{CDCl}_3$ , 600MHz:

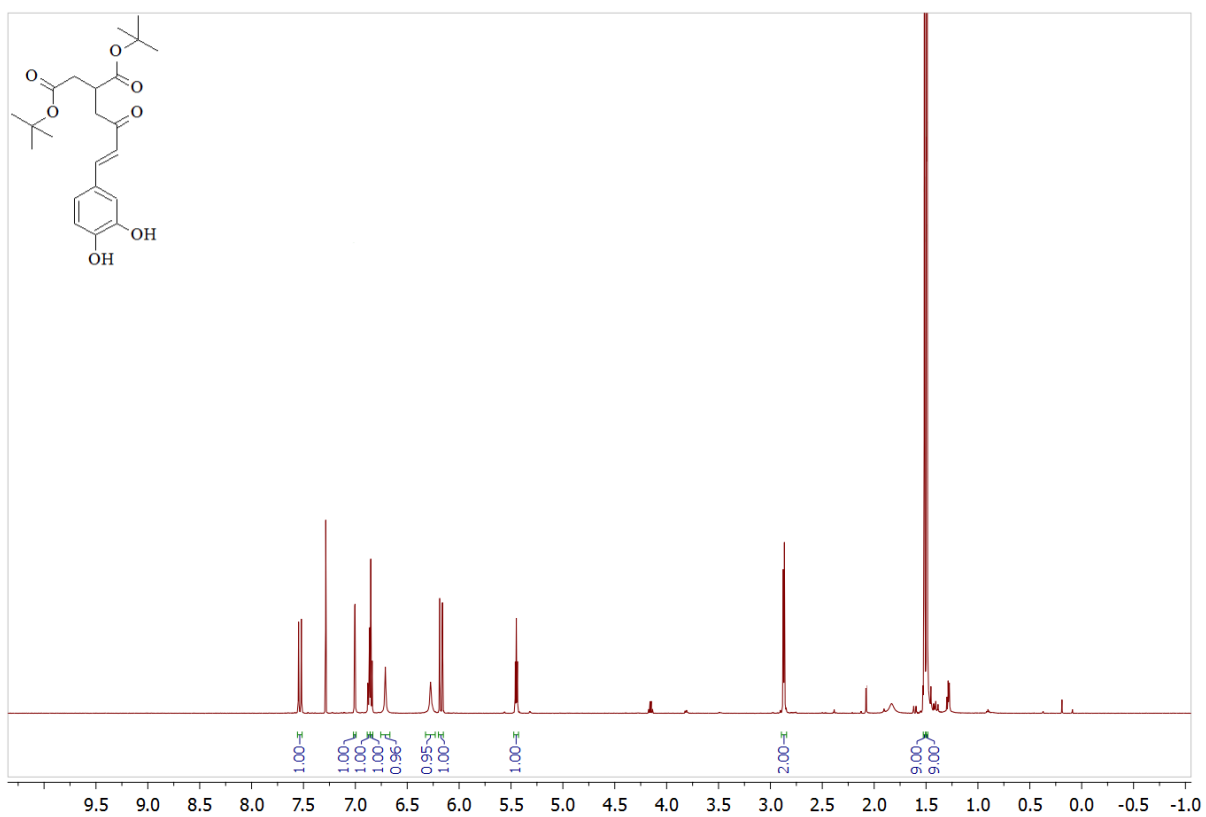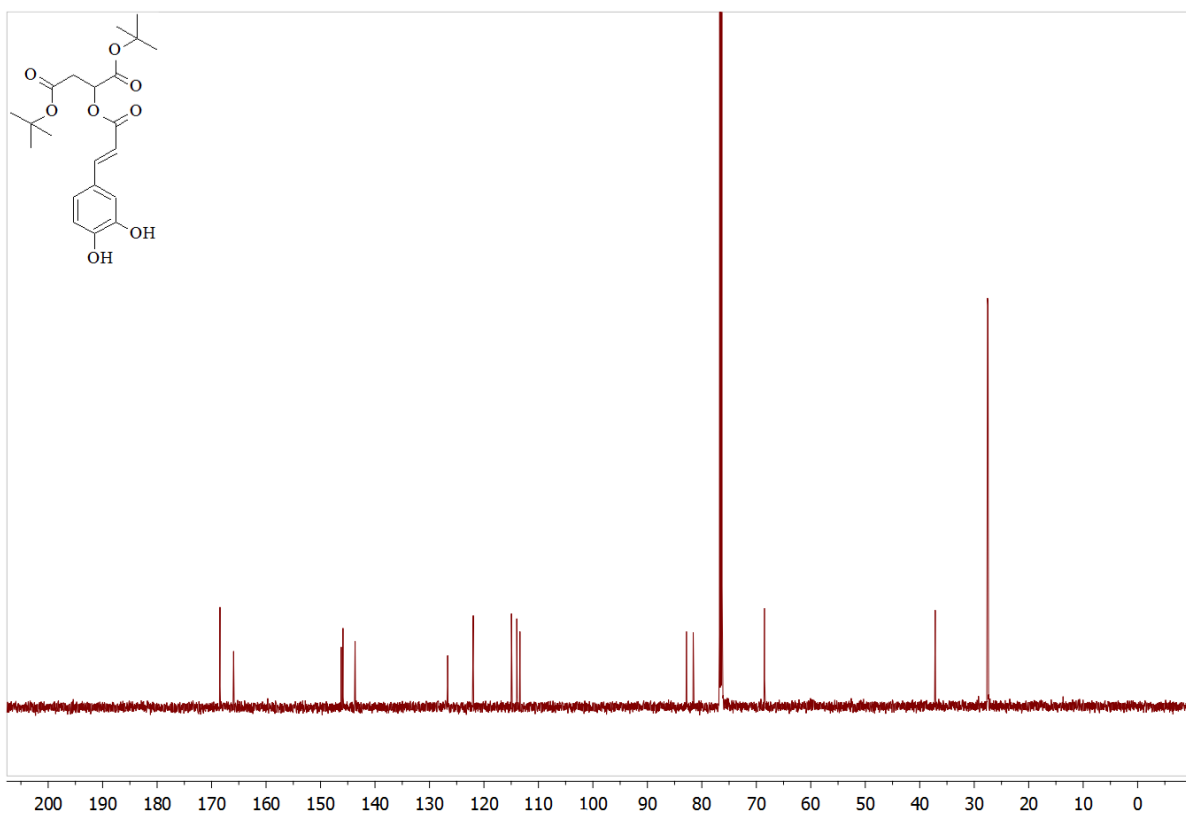

$^1\text{H}$  and  $^{13}\text{C}$  NMR data for **11** in acetone- $d_6$ , 600MHz:

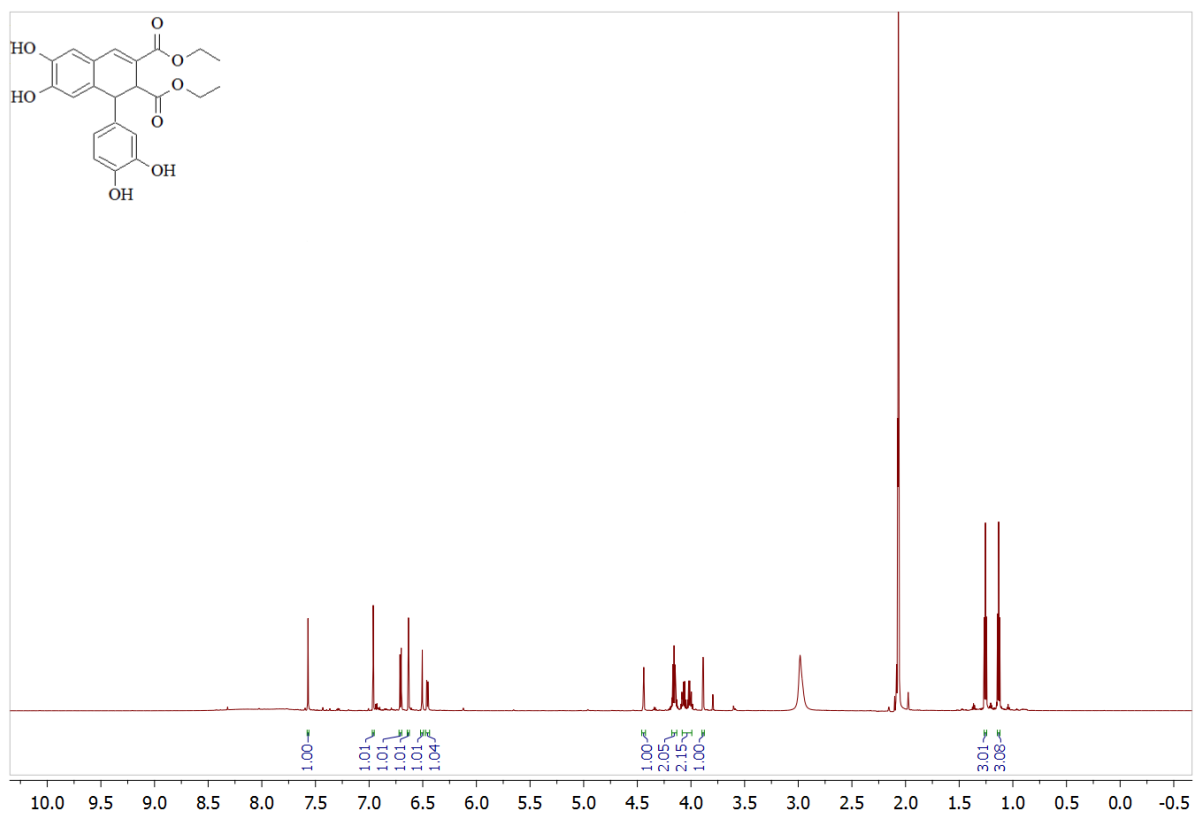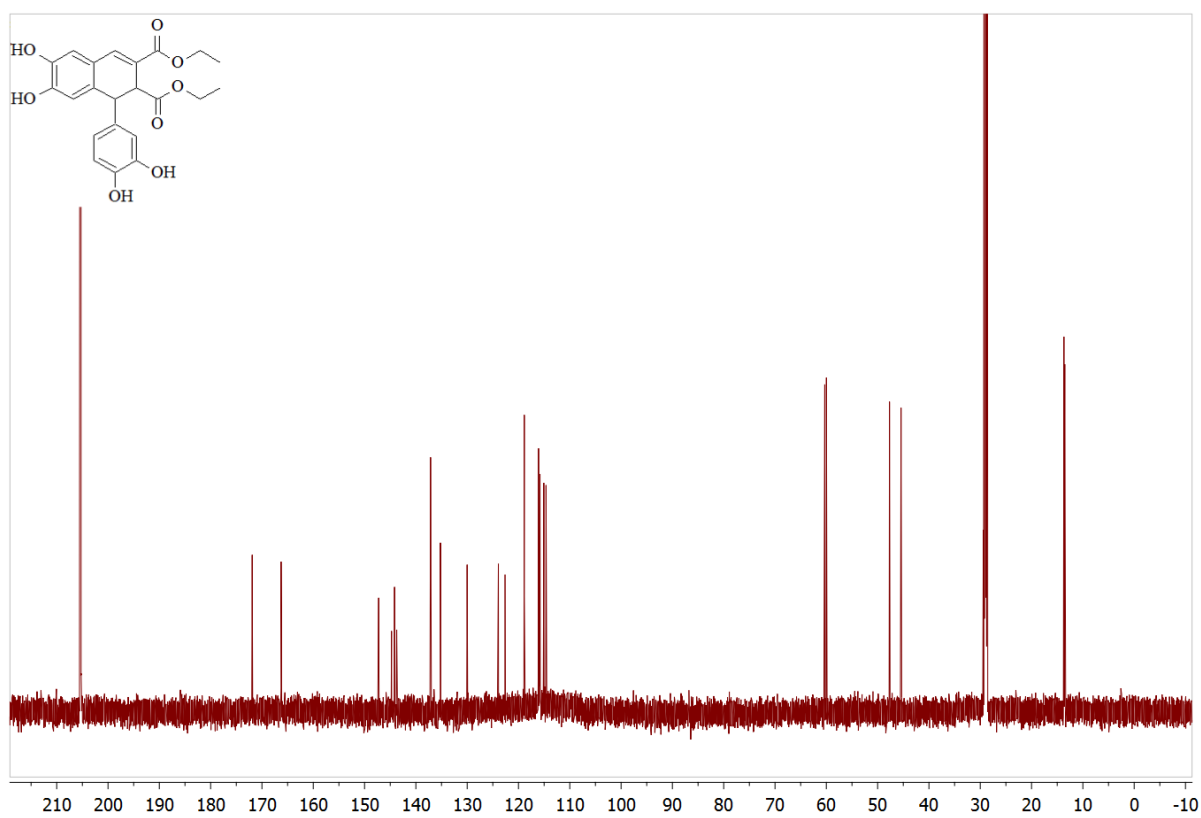

$^1\text{H}$  and  $^{13}\text{C}$  NMR data for **I (s706)** in ratio 1:3 (isosevanol:sevanol) in  $\text{D}_2\text{O}$ , 600MHz:

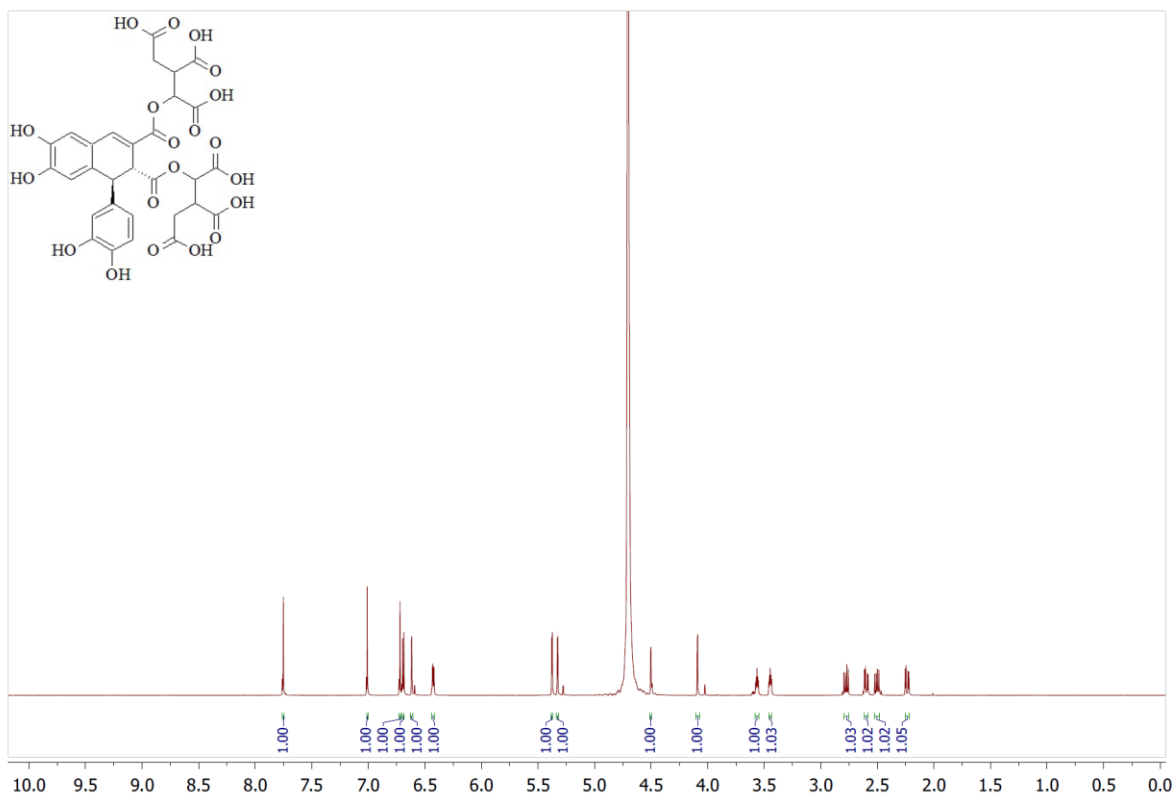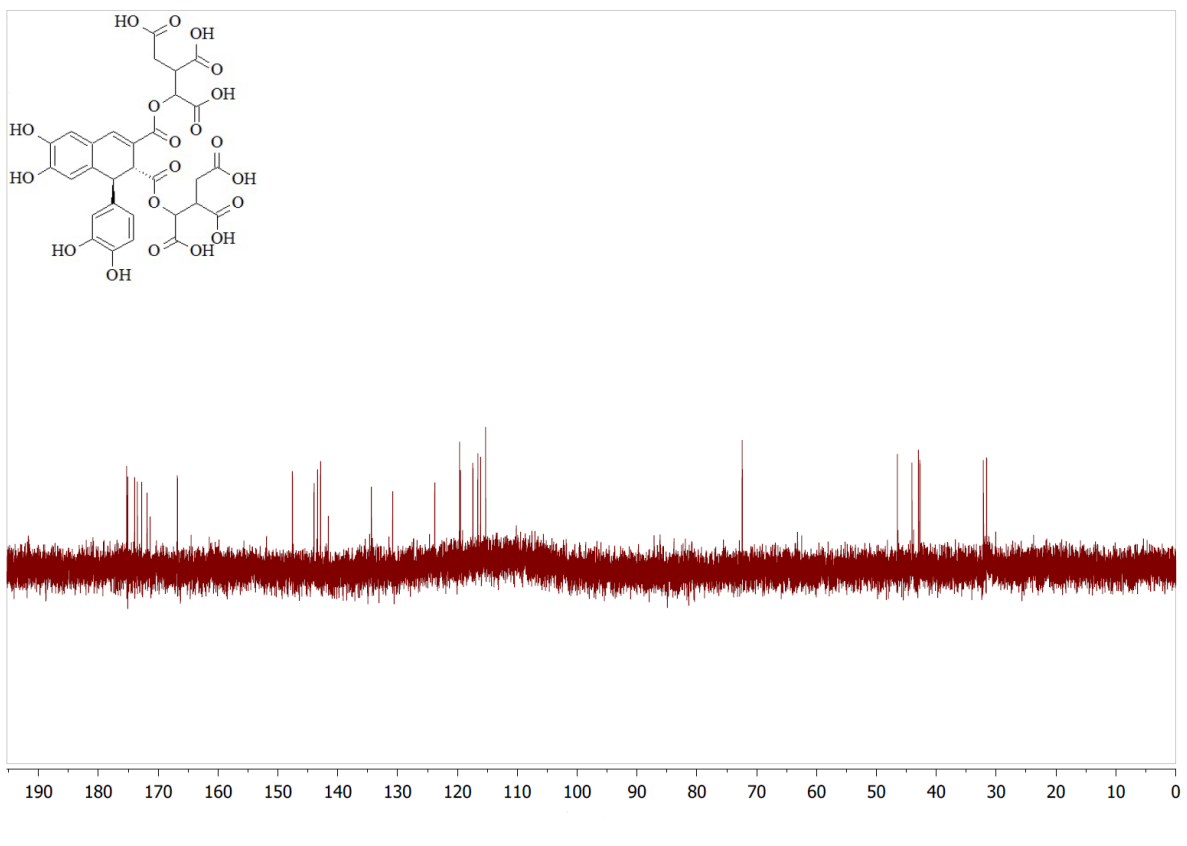

$^1\text{H}$  and  $^{13}\text{C}$  NMR data for **II (s788)** in acetone, 800MHz:

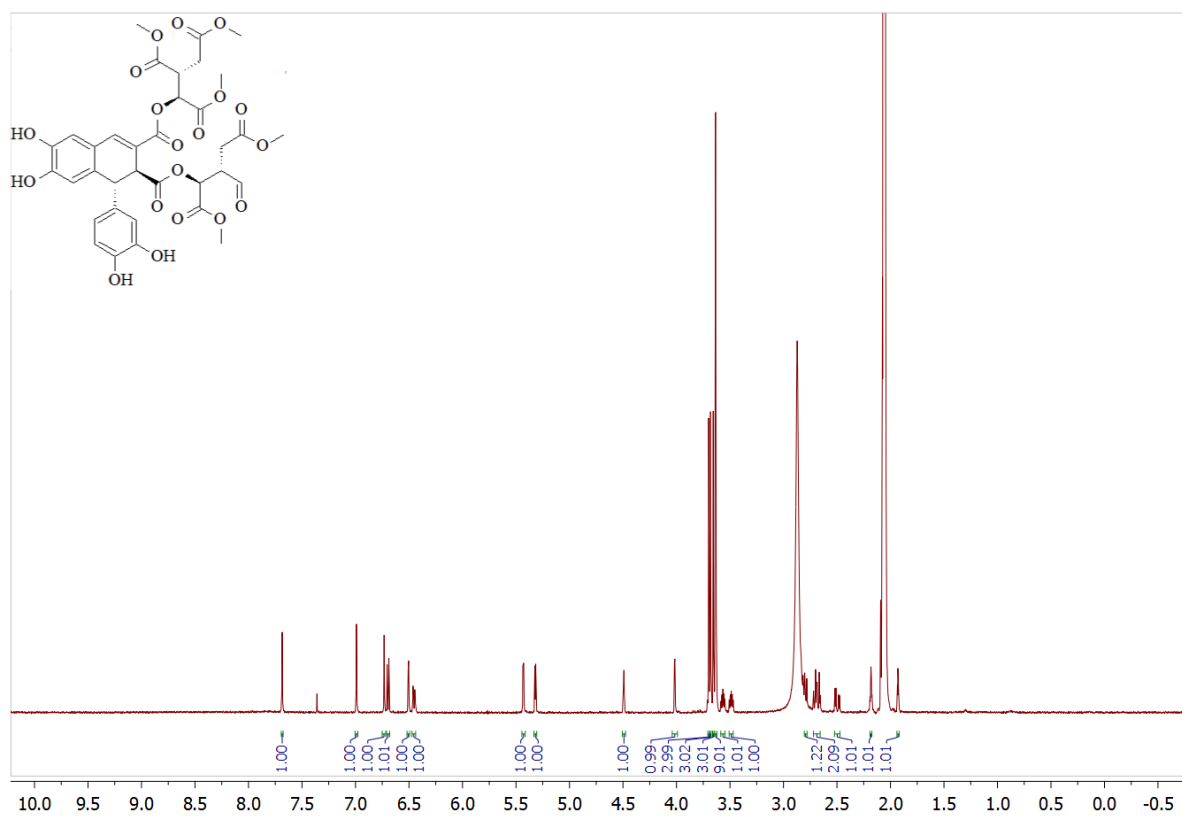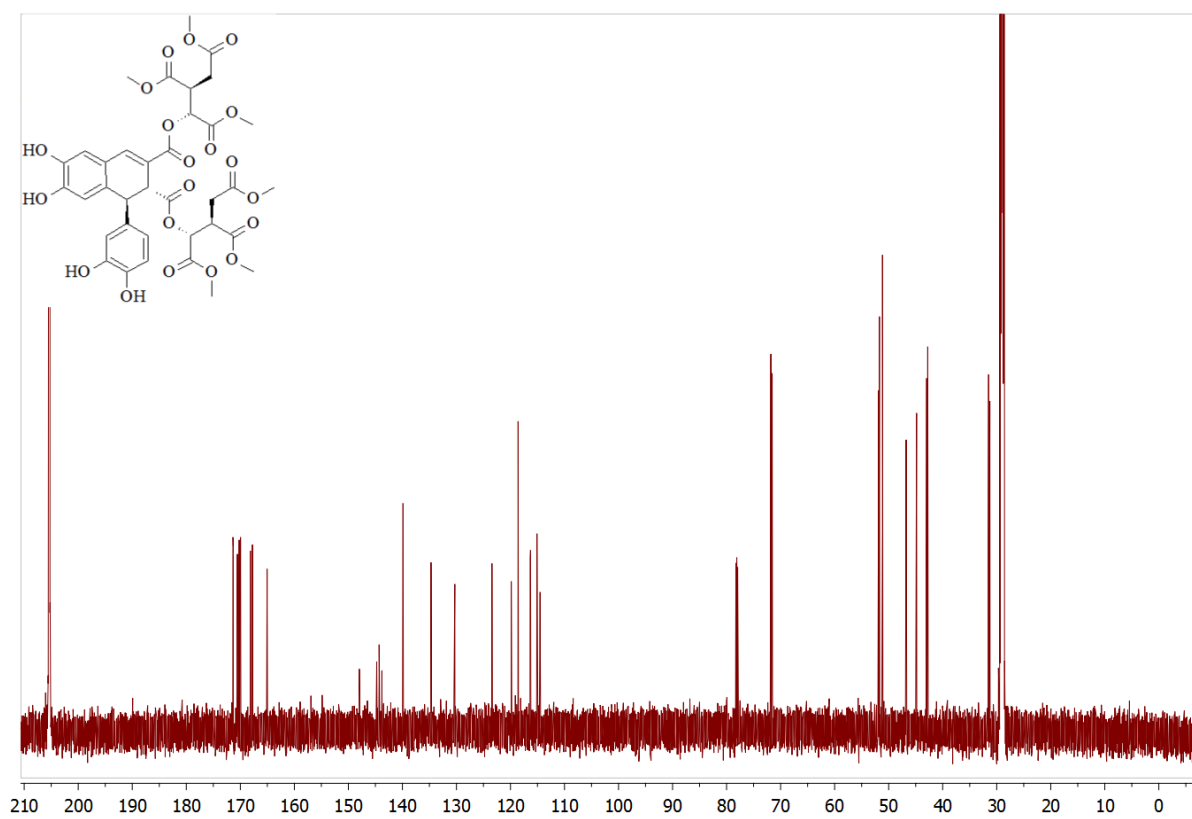

$^1\text{H}$  and  $^{13}\text{C}$  NMR data for **III (s590)** in  $\text{D}_2\text{O}$ , 600MHz:

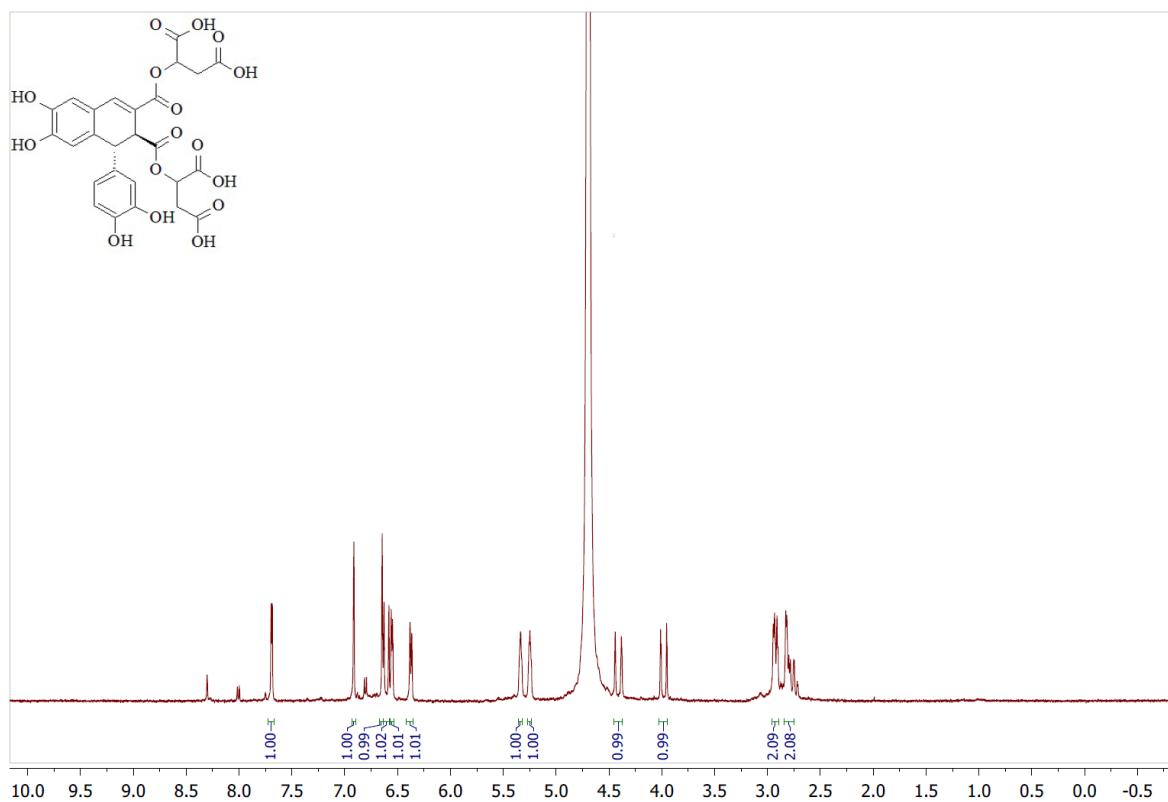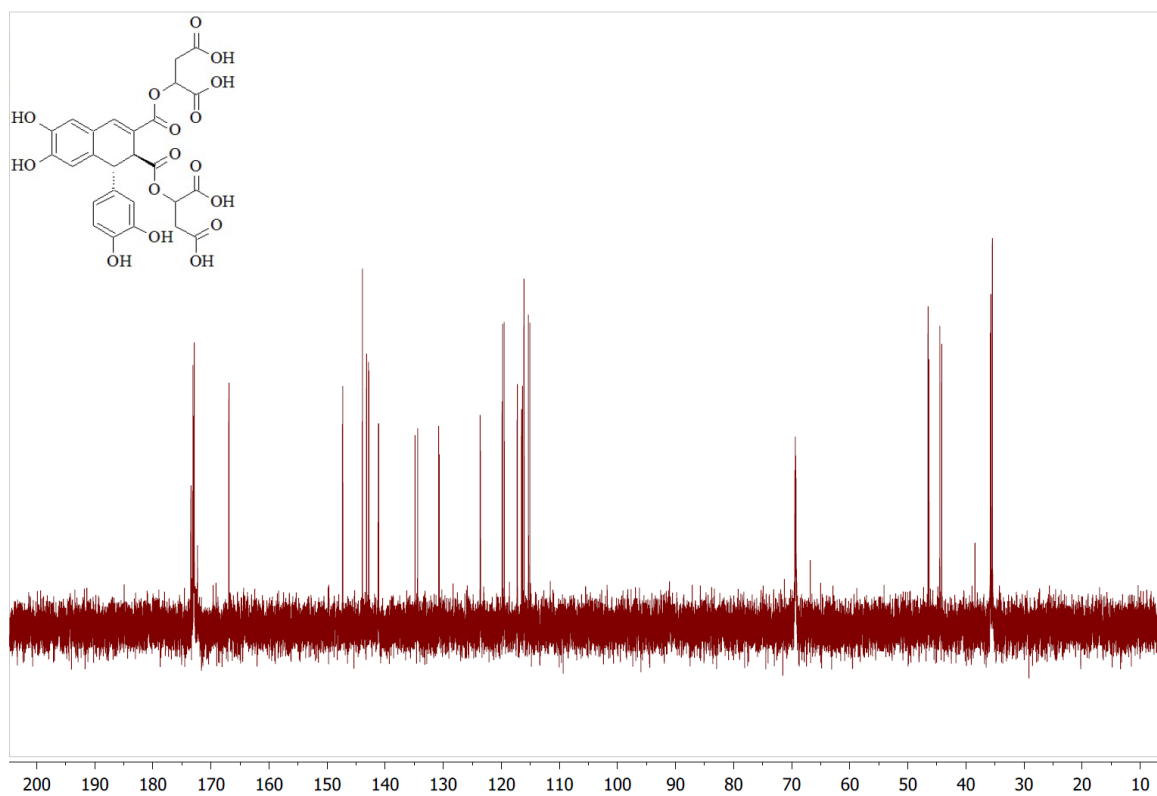



$^1\text{H}$  and  $^{13}\text{C}$  NMR data for **IV (EA)** in  $\text{D}_2\text{O}$ , 600MHz:

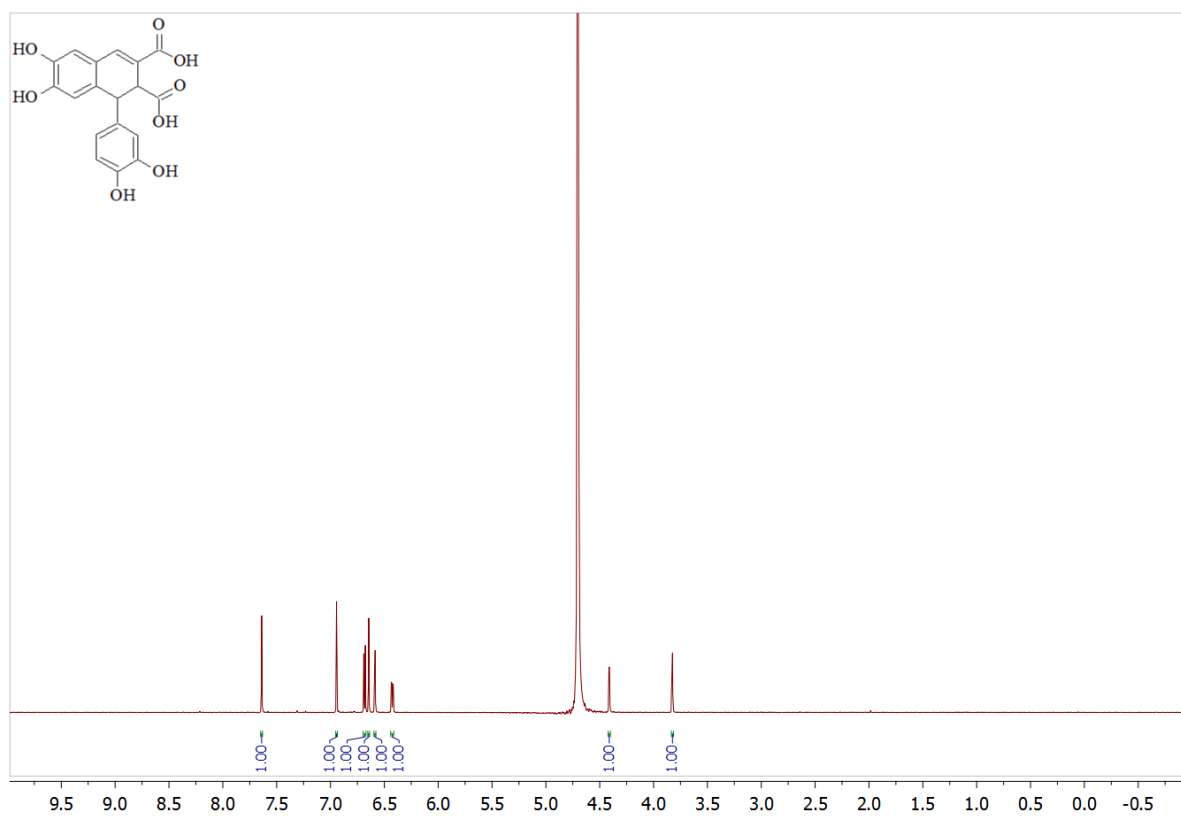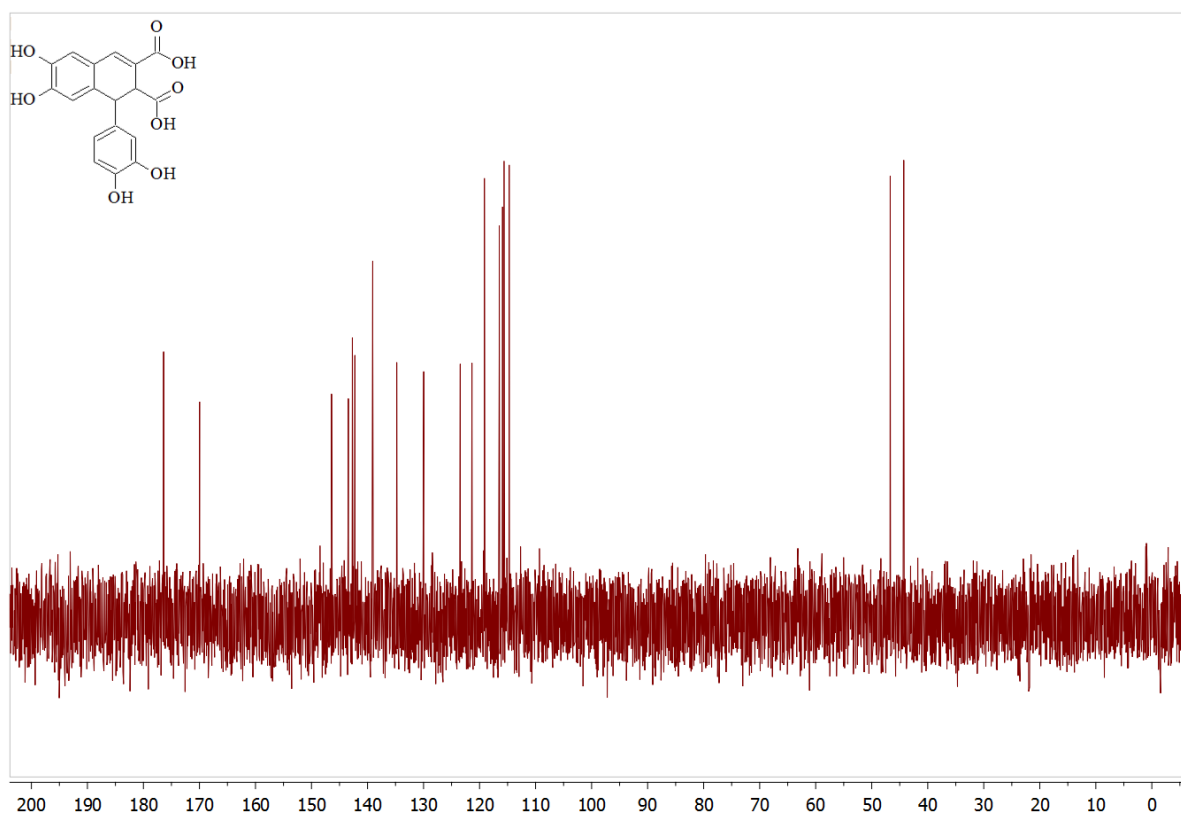

Supplement: pharmaceuticals-13-00163-s001.pdf [file pharmaceuticals-13-00163-s001.pdf]
